# Supplementary material for: SrCo0.85Fe0.1P0.05O3−δ perovskite as a cathode for intermediate-temperature solid oxide fuel cells
Source: Royal Society of Chemistry journal article supplement (doi:10.1039/c3ta12781h), 2013-01-01
Supplement: c3ta12781h.pdf [file c3ta12781h.pdf]

## Supplementary information: Journal of Material Chemistry A

### SrCo<sub>0.85</sub>Fe<sub>0.1</sub>P<sub>0.05</sub>O<sub>3-δ</sub> Perovskite as a Cathode for Intermediate-Temperature Solid Oxide Fuel Cell

Mengran Li, Wei Zhou\* , Xiaoyong Xu and Zhonghua Zhu\*

*School of Chemical Engineering, The University of Queensland, St. Lucia, Queensland 4072, Australia. Tel.: +61 733653528; fax: +61 733654199; E-mail: wei.zhou@uq.edu.au (W. Zhou), z.zhu@uq.edu.au (Z. Zhu).*

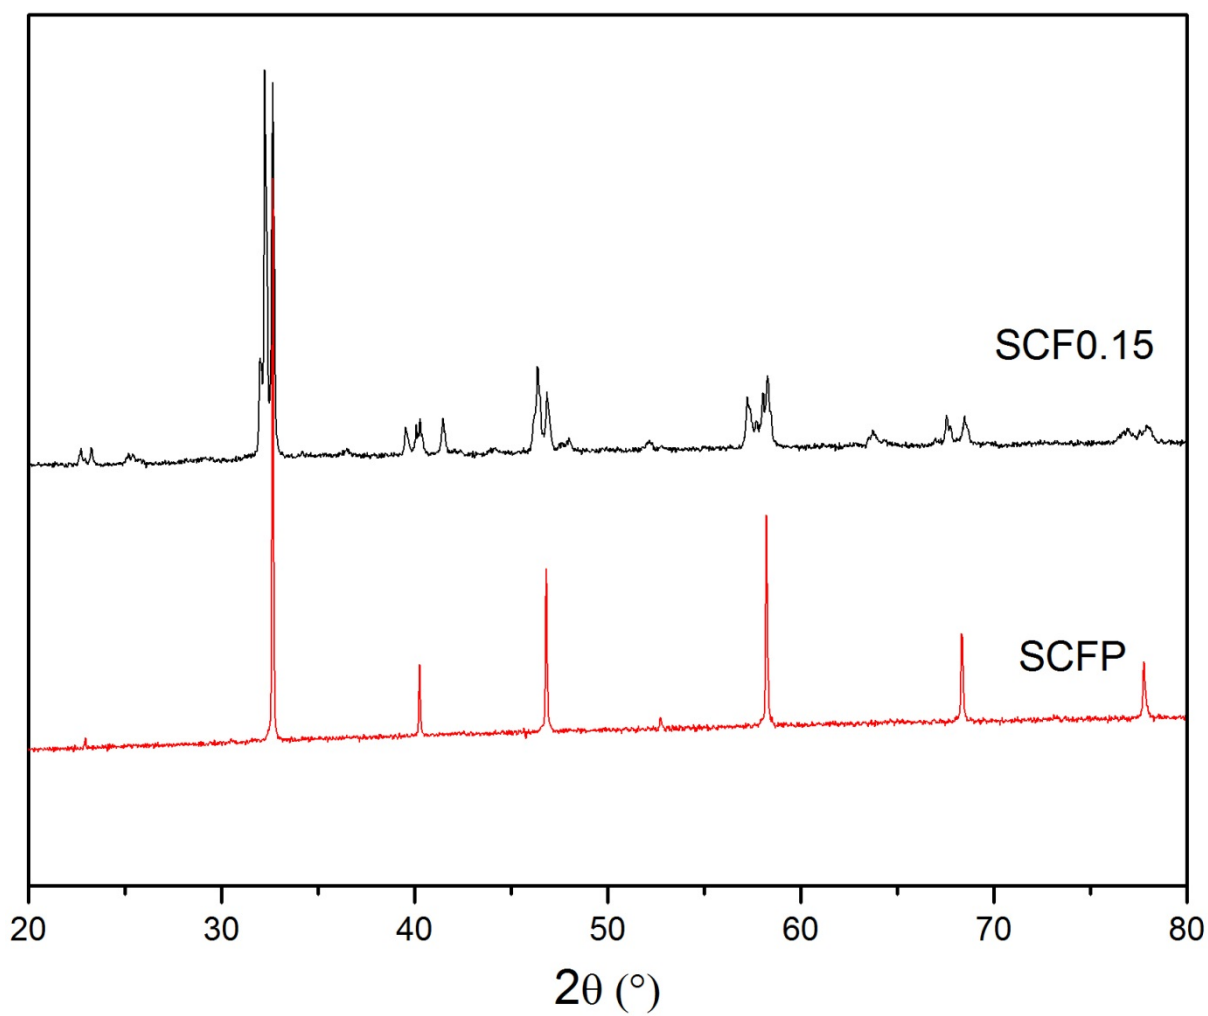

**Fig. S1** XRD profiles of SCFP and SCF0.15 powders after TGA analysis at 600°C first being in flowing air, and then in N<sub>2</sub>, and finally in air.

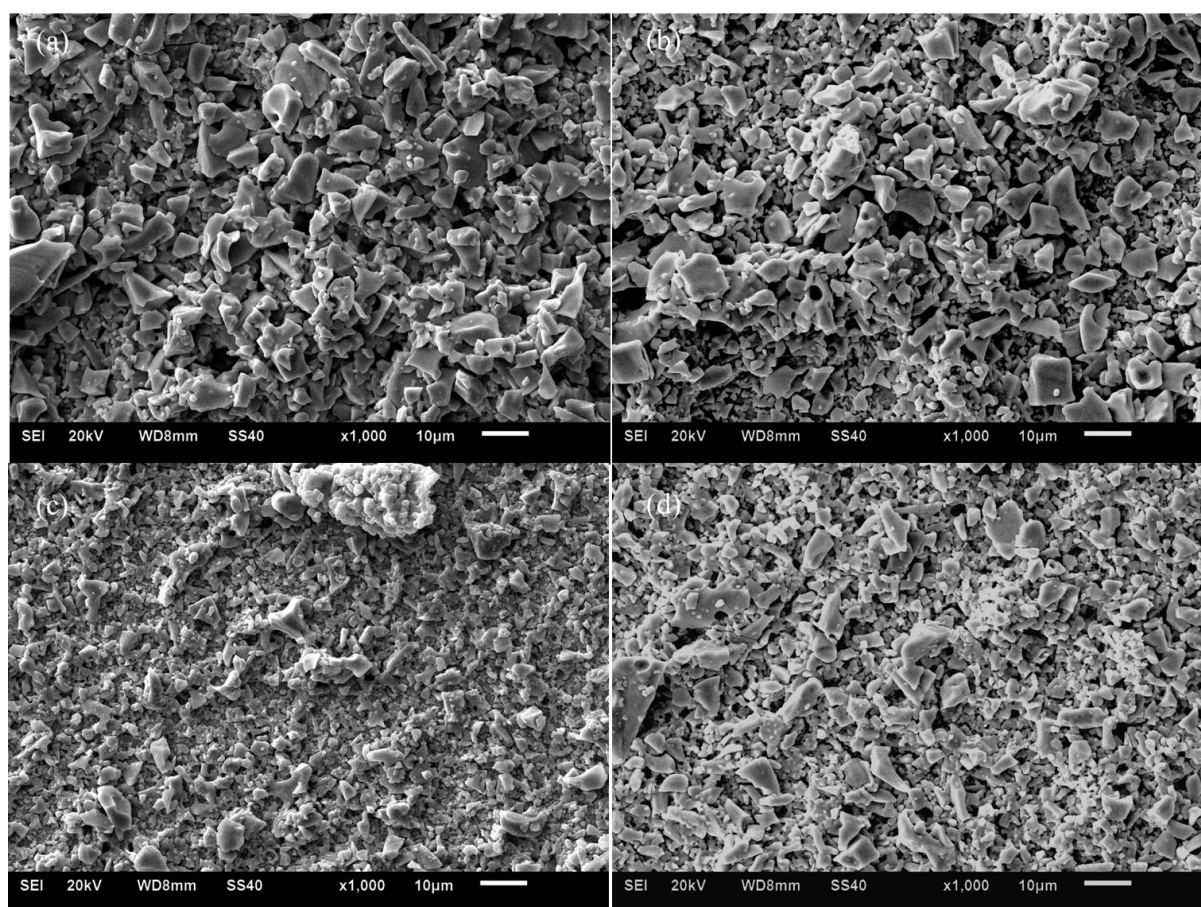

**Fig. S2** Microstructures of (a) SCF0.15 and (c)SCFP cathodes before and (b) SCF0.15 (d)SCFP cathodes after annealing at 600°C for 40h in air.
